# Supplementary material
Source: Springer Nature journal article supplement (https://www.springermedizin.de/resource/supplementary/12967_2004_69_MOESM2_ESM.pdf/9575726)

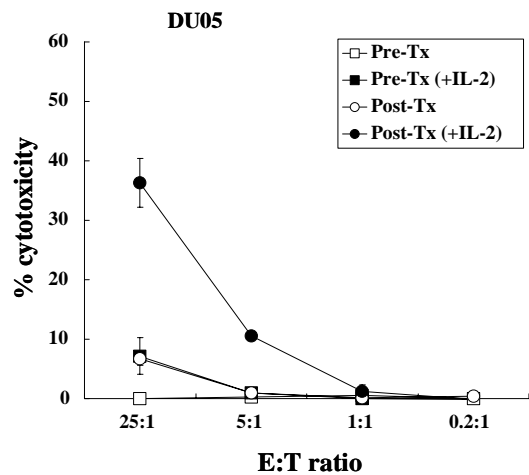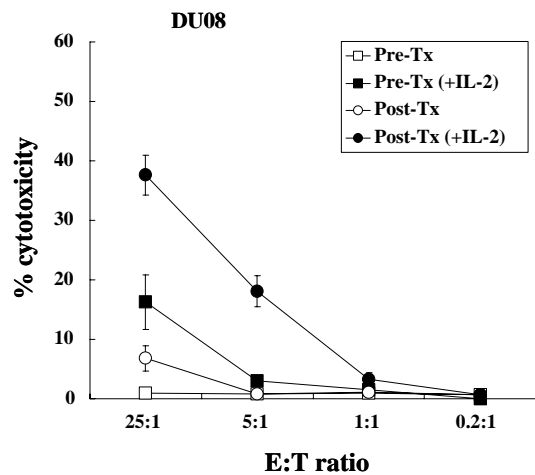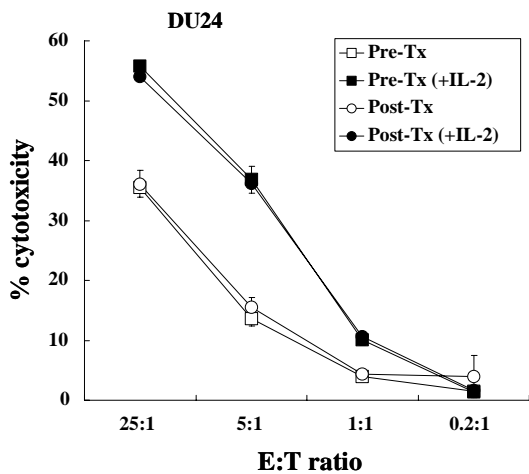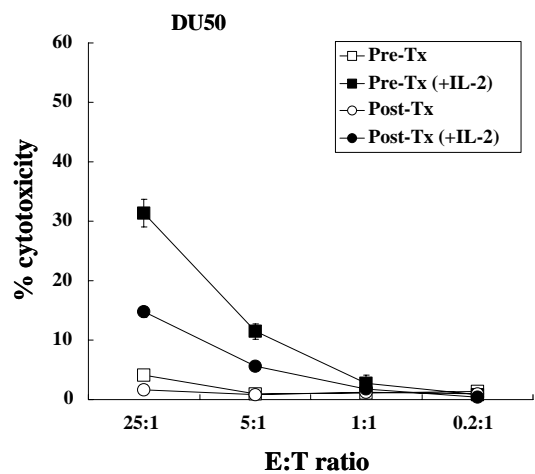

Supplement: MOESM2 [file 9575726]
